# Supplementary material for: Professional Care Networks of Frail Older People: An Explorative Survey Study from the Patient Perspective
Source: PubMed Central journal article supplement (PMC7147679; doi:10.5334/ijic.4721), 2020-04-01
Supplement: ijic-20-1-4721-s2.pdf [file ijic-20-1-4721-s2.pdf]

**Appendix 2. Caregivers in (sub)categories of care and welfare and frequencies of contact in the past 12 months**

|             | Subcategories healthcare                         |                        | Abbr.                               | Caregivers                                       | Frequency of contact in past 12 months % / n |     |    |
|-------------|--------------------------------------------------|------------------------|-------------------------------------|--------------------------------------------------|----------------------------------------------|-----|----|
| HEALTH CARE | 1. Providers of primary care, medical care       | 1.1                    | HA                                  | General practitioner                             | 93%                                          | 41  |    |
|             |                                                  | 1.2                    | POH                                 | Practice nurse                                   | 68%                                          | 30  |    |
|             |                                                  | 1.3                    | DA                                  | GP assistant                                     | 66%                                          | 29  |    |
|             |                                                  | 1.4                    | APO                                 | Pharmacist                                       | 96%                                          | 42  |    |
|             |                                                  | 1.5                    | TA                                  | Dentist                                          | 30%                                          | 13  |    |
|             | 2. Providers of primary care, in-home care       | 2.1                    | VPK                                 | Community nurse                                  | 48%                                          | 21  |    |
|             |                                                  | 2.2                    | VERZ                                | Licensed practical/vocational nurse              | 66%                                          | 29  |    |
|             | 3. Providers of primary care, other medical care | 3.1                    | VPKS                                | Specialist nurse                                 | 0%                                           | 0   |    |
|             |                                                  | 3.2                    | ALT                                 | Alternative healer                               | 7%                                           | 3   |    |
|             |                                                  | 3.3                    | VPKO                                | Other nurse                                      | 5%                                           | 2   |    |
|             | 4. Allied health professionals                   | 4.1                    | FYSIO                               | Physiotherapist                                  | 55%                                          | 24  |    |
|             |                                                  | 4.2                    | ERGO                                | Occupational therapist                           | 18%                                          | 8   |    |
|             |                                                  | 4.3                    | CESAR                               | Cesar remedial therapy                           | 5%                                           | 2   |    |
|             |                                                  | 4.4                    | MD                                  | Mensendieck remedial therapy                     | 2%                                           | 1   |    |
|             |                                                  | 4.5                    | DIET                                | Dietician                                        | 21%                                          | 9   |    |
|             |                                                  | 4.6                    | LOGO                                | Speech therapist                                 | 2%                                           | 1   |    |
|             |                                                  | 4.7                    | PODO                                | Chiropodist/podiatrist                           | 14%                                          | 6   |    |
|             |                                                  | 4.8                    | PEDI                                | Pedicurist                                       | 73%                                          | 32  |    |
|             |                                                  | 4.9                    | MH                                  | Dental hygienist                                 | 0%                                           | 0   |    |
|             |                                                  | 4.10                   | OHP                                 | Other provider of allied care                    | 11%                                          | 5   |    |
|             | 5. Providers of medical specialist care          | 5.1                    | TROM                                | Thrombosis service provider                      | 27%                                          | 12  |    |
|             |                                                  | 5.2                    | MS                                  | Medical specialist                               | 75%                                          | 33  |    |
|             |                                                  | 5.3                    | VPKZ                                | Hospital nurse                                   | 7%                                           | 3   |    |
|             |                                                  | 5.4                    | OHZ                                 | Other hospital-based specialist care provider    | 2%                                           | 1   |    |
|             | 6. Providers of mental care                      | 6.1                    | POHGGZ                              | Mental health nurse primary care                 | 2%                                           | 1   |    |
|             |                                                  | 6.2                    | SPV                                 | Mental health nurse                              | 21%                                          | 9   |    |
|             |                                                  | 6.3                    | PSYCHO                              | Psychologist                                     | 9%                                           | 4   |    |
|             |                                                  | 6.4                    | ZTBD                                | Dementia counsellor                              | 2%                                           | 1   |    |
| 6.5         |                                                  | OHPS                   | Provider of other mental healthcare | 2%                                               | 1                                            |     |    |
| SOCIAL CARE | Subcategories social care                        |                        | Providers of social care            |                                                  |                                              |     |    |
|             | 6. Professional providers of social care         | 7.1                    | HH                                  | Certified nursing aid/housekeeper                | 89%                                          | 39  |    |
|             |                                                  | 7.2                    | OA                                  | Provider of social care service for older people | 14%                                          | 6   |    |
|             |                                                  | 7.3                    | DB                                  | Day centre monitor                               | 23%                                          | 10  |    |
|             |                                                  | 7.4                    | MW                                  | Social worker                                    | 7%                                           | 3   |    |
|             |                                                  | 7.5                    | WMO                                 | Municipal counsellor                             | 25%                                          | 11  |    |
|             |                                                  | 7.6                    | KERK                                | Priest/pastor/others from the church             | 36%                                          | 16  |    |
|             |                                                  | 7.7                    | OHW                                 | Provider of other social care                    | 9%                                           | 4   |    |
|             | 8. Voluntarily providers of social care          | 8.1                    | VWZ                                 | Volunteer from Zonnebloem                        | 25%                                          | 11  |    |
|             |                                                  | 8.2                    | VW                                  | Volunteer social care service for older people   | 14%                                          | 6   |    |
|             |                                                  | 8.3                    | OVW                                 | Other volunteer                                  | 5%                                           | 2   |    |
|             | INFORMAL                                         | 9. Informal caregivers | 9.1                                 | MZ                                               | Informal caregiver                           | 91% | 68 |

**Appendix 2. (continued) Caregivers in (sub)categories of care and welfare and frequencies of contact in the past 12 months**

**Specification Medical Specialists**

| <b>Abbreviation</b> | <b>Caregiver</b>                      |
|---------------------|---------------------------------------|
| CARDIO              | Cardiologist                          |
| KNO                 | Ear, nose, and throat specialist      |
| LONG                | Pulmonologist                         |
| GYN                 | Gynaecologist                         |
| NEURO               | Neurologist                           |
| OOG                 | Ophthalmologist                       |
| REVI                | Rehabilitation specialist             |
| DERMA               | Dermatologist                         |
| INTER               | Internist                             |
| GERI                | Geriatrician                          |
| SO                  | Nursing home physician specialists    |
| SH                  | Emergency physician                   |
| MDL                 | Gastrointestinal and liver specialist |
| ORTHO               | Orthopaedist/orthopaedic surgeon      |
| PSYCHI              | Psychiatrist                          |
| REUMA               | Rheumatologist                        |
| URO                 | Urologist                             |
| RADIO               | Radiologist/radiotherapist            |
| ONCO                | Oncologist                            |
| MSO                 | Other medical specialist              |
